# Supplementary material for: A Novel Analytical Tool to Capture Wind Profile Variability for Wind Energy Assessment: Fast, Simple, and Beyond State-of-the-Art in Complex Terrain
Source: Copernicus journal article supplement (doi:10.5194/wes-2025-271), 2025-12-30
Supplement: Supplementary file 1 [file Table_3_editable.xlsx]

## Sheet: Sheet1
Case study site			LiDAR - Turbine Distance	Number of Wind profiles	Bias from measured power [kW]
Turbine	LiDAR	Wind direction			Analytical	An. No-turb.	OpenFAST	IEC Standard
T1	L9	Northerly	207m	25	-13.7	-26.4	-50.2	-25.6
T1	L9	Southerly		25	-242.9*	-267.9*	-468.7	-555.5
T2	L5	Northerly	278m	25	223.7	256.6	412	254.8
T2	L6	Southerly		25	-20.9	-25.2	-10.6	-26
T3	L10	Northerly	116m	6	-32.9	-46.4	-79.6	-55.5
T3	L10	Southerly		25	-27.8	-37.4	17.2	-39.1
T4	L4	Northerly	156m	25	130.9	158.2	154.5	141.9
T4	L4	Southerly		25	-13.1	-26.4	-53.9	-20
T5	L7	Northerly	114m	25	67.8	64.7	-86.8	103
T5	L7	Southerly		25	-105.9	-121.6	-71.9	-133.7
* Corrected for wake effects				RMSE [kW]	140.3	150.5	215.7	153.8
				MAE [kW]	95	103.5	121.01	108.11
				R2	0.911	0.897	0.794	0.893
